# Supplementary material for: Loss of Prohibitin Membrane Scaffolds Impairs Mitochondrial Architecture and Leads to Tau Hyperphosphorylation and Neurodegeneration
Source: PubMed Central journal article supplement (PMC3493444; doi:10.1371/journal.pgen.1003021), 2012-11-08
Supplement: pgen.1003021.s001.pdf [file pgen.1003021.s001.pdf]

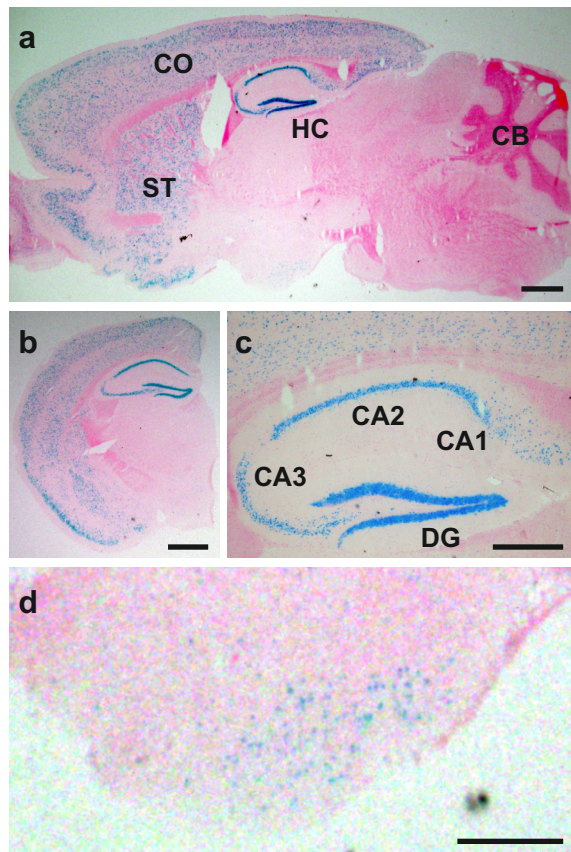

**Figure S1**
